# Supplementary material for: Zeb1-Hdac2-eNOS circuitry identifies early cardiovascular precursors in naive mouse embryonic stem cells
Source: PubMed Central journal article supplement (PMC5876398; doi:10.1038/s41467-018-03668-0), 2018-03-29
Supplement: 41467_2018_3668_MOESM1_ESM.pdf [file 41467_2018_3668_MOESM1_ESM.pdf]

**A Zeb1-Hdac2-eNOS circuitry identifies early cardiovascular precursors in naïve mouse embryonic stem cells**

Cencioni et al.

## Supplementary figures

## Supplementary Fig. 1

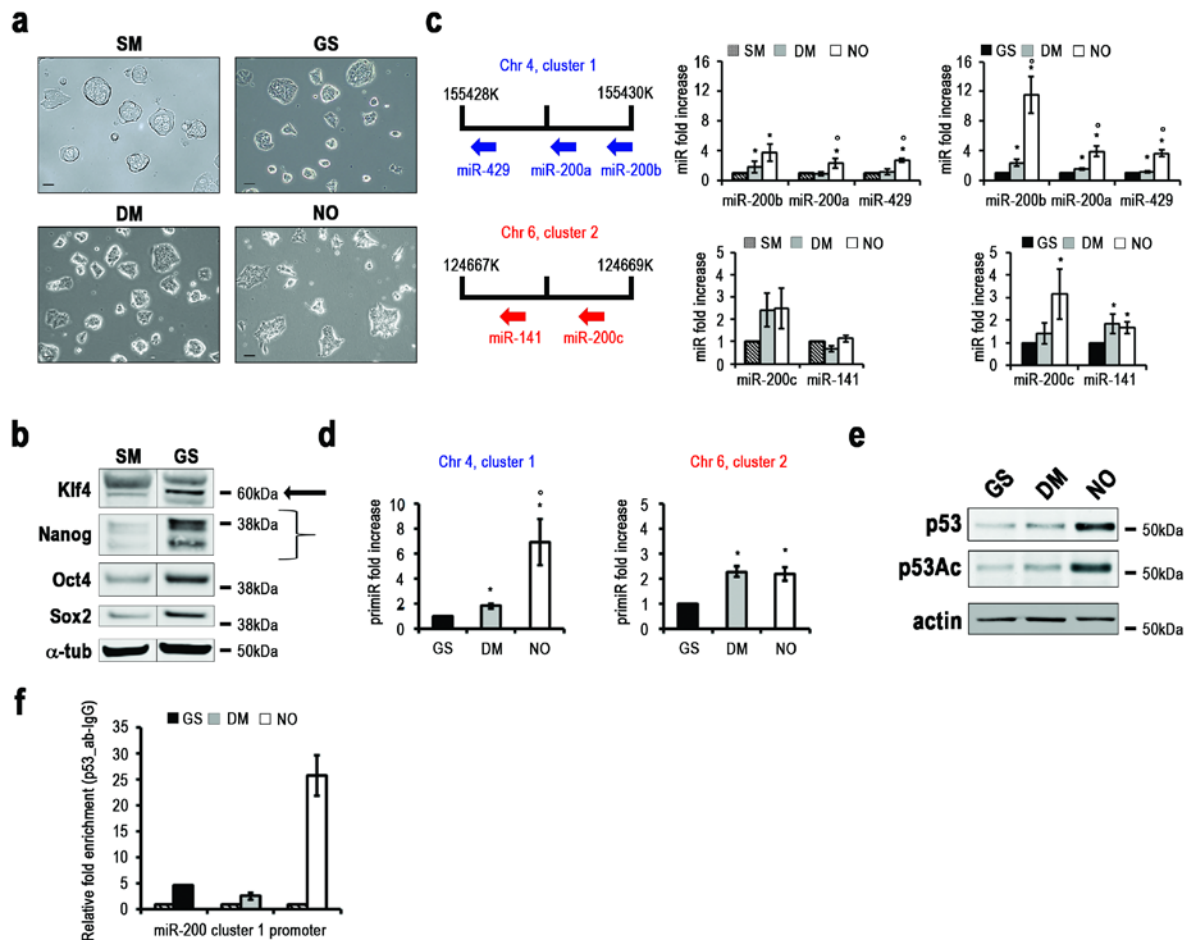**Supplementary Fig. 1** Naïve mESC characterization and response to an exogenous source of NO.

(a) Representative phase contrast microscopy images of mESC cultured 24 h in SM, GS, DM and NO. Scale bar 10 $\mu$ m. (b) Representative western blot analysis of three independent cell extract preparations from mESC cultured 24 h in SM or GS probed with Klf4, Nanog, Oct4 and Sox2 specific antibodies. In each condition,  $\alpha$ -tubulin was used as loading control. Full-length blot provided in Supplementary Fig. 12a. (c) Left upper and lower panels: schematic representation of miR-200 family genomic organization (cluster 1, blue upper; cluster 2, red lower). Right panel: qRT-PCR analysis of miR-200 family member levels in DM (gray bars) and NO (white bars) expressed as fold-induction versus SM (striped bars) or GS (black bars) respectively (n=8 each time point; \*p < 0.05 Vs SM or GS;  $^{\circ}$  p < 0.05 vs. DM). (d) qRT-PCR analysis of miR-200 primiRs from cluster 1 (left panel) or cluster 2 (right panel) in mESC cultured 24h in GS (black bars), DM (grey bars) and NO (white bars). Data are shown as the mean fold increase  $\pm$ s.e.m. against GS after subtraction of the housekeeping gene p0 signal (n=5; \*p < 0.05 vs. GS;  $^{\circ}$  p < 0.05 vs. DM). (e) Representative western blot analysis of cell extracts obtained from mESC cultured 24h in GS, DM and NO (n=3 each group) probed with total (p53) or acetylated p53 (p53Ac) antibodies. Actin antibody was used as loading control for each extract. Full-length blot provided in Supplementary Fig. 12b. (f) ChIP/qRT-PCR analysis of p53 chromatin binding on miR-200 cluster 1 promoter. Chromatins were extracted from mESC culture 24h in GS (black bar), DM (gray bar) and NO (white bar). Data are shown as mean fold increase  $\pm$ s.e.m. compared to IgG value (striped bars) after Input normalization (n=3). Data analysed by Kolmogorov-Smirnov test.

Supplementary Fig. 2

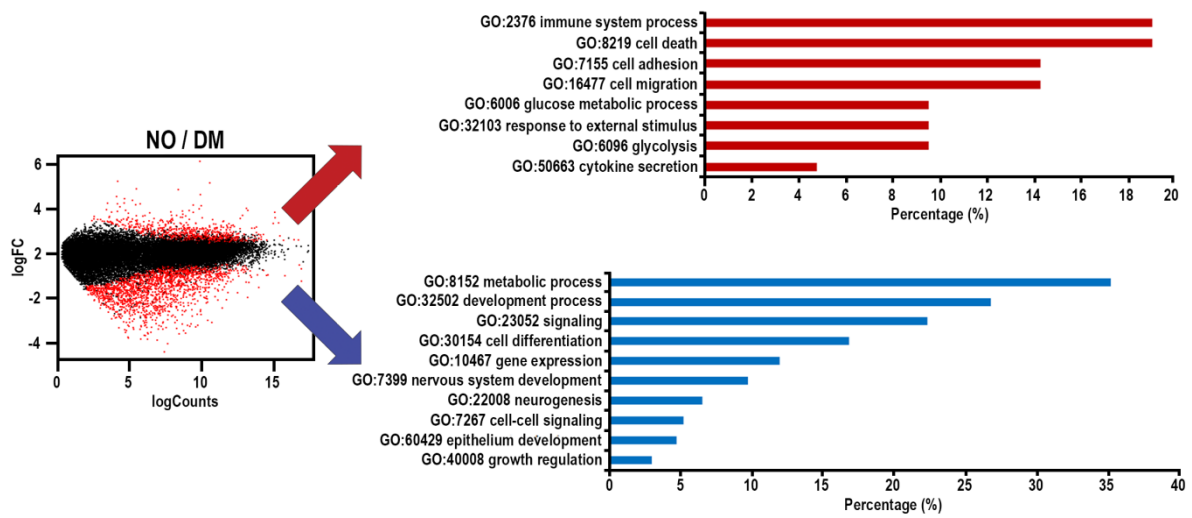

**Supplementary Fig. 2** NO-responsive transcripts compared to DM. Left panel: MA plot of differentially regulated genes (DEGs) expressed in mESC cultured for 24h in NO compared to DM condition. Red dots show genes with a padj < 0.05. Right panels: Gene ontology analysis of DEG between mESC cultured in NO and DM. Up-regulated genes depicted in the upper panel, red bar graph; down-regulated genes in the lower panel, blue bar graph.

## Supplementary Fig. 3

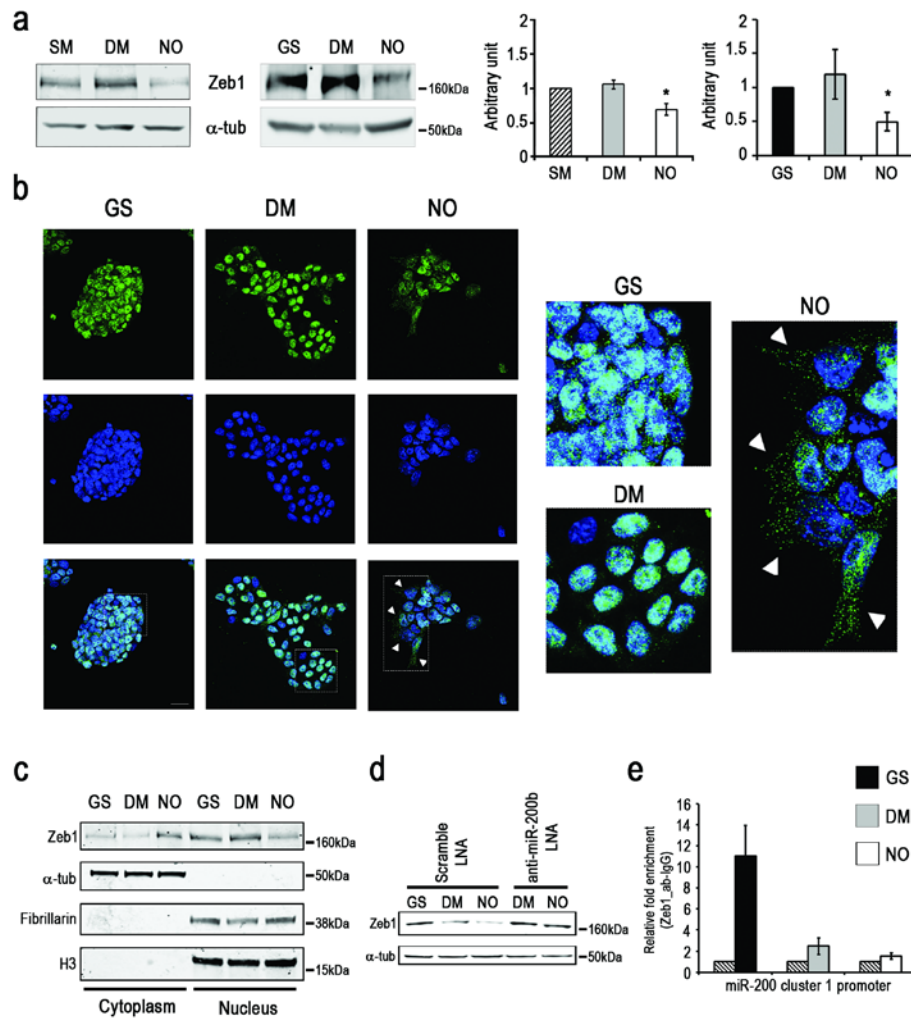

**Supplementary Fig. 3** *Zeb1* regulation in naïve and differentiating mESC. **(a)** Representative western blotting analysis of cell extracts obtained from mESC cultured 24h in SM, DM and NO (left panel) and GS, DM and NO (right panel) probed with *Zeb1* antibody. For each extract,  $\alpha$ -tubulin was used as loading control. The experiment was repeated three times. Right panels show the result of densitometric analysis (\* $p < 0.05$  vs. stemness condition). Full-length blot provided in Supplementary Fig. 13a. **(b)** Representative confocal microscopy images depicting mESC cultured 24h in GS, DM or NO. Cells were probed by an anti-*Zeb1* antibody (green; upper panels). Nuclei were counterstained with TROPRO 3 (blue; middle panels). Merged fluorescence images are shown in the lower panels. On the right, the insets contain enlargements of the selected areas (dashed squares). Scale bar 20 $\mu$ m. **(c)** Representative western blotting analysis of cytoplasm/nuclear fractionation extracts obtained from mESC cultured 24h in GS, DM or NO probed with *Zeb1*. For cytoplasmic extracts,  $\alpha$ -tubulin was used as a loading control, whereas for nuclear extracts Fibrillarin and H3 were used as loading control. The experiment was repeated three times. Full-length blot provided in Supplementary Fig. 13b. **(d)** Representative western blotting analysis of cell extracts obtained from mESC cultured 24h in GM, DM and NO after nucleofection either with Scramble\_LNA or anti-miR-200b\_LNA probed with *Zeb1* antibody. For each extract,  $\alpha$ -tubulin was used as loading control. The experiment was repeated three times. Full-length blot provided in Supplementary Fig. 13c. **(e)** ChIP/qRT-PCR analysis of *Zeb1* chromatin association to the miR-200 cluster 1 promoter region. Chromatins were extracted from mESC cultured 24h in GS (black bar), DM (gray bar) and NO (white bar). Data are shown as mean fold increase  $\pm$ s.e.m. compared to IgG value (striped bars) after Input normalization (n=3). Data analysed by Kolmogorov-Smirnov test.

## Supplementary Fig. 4

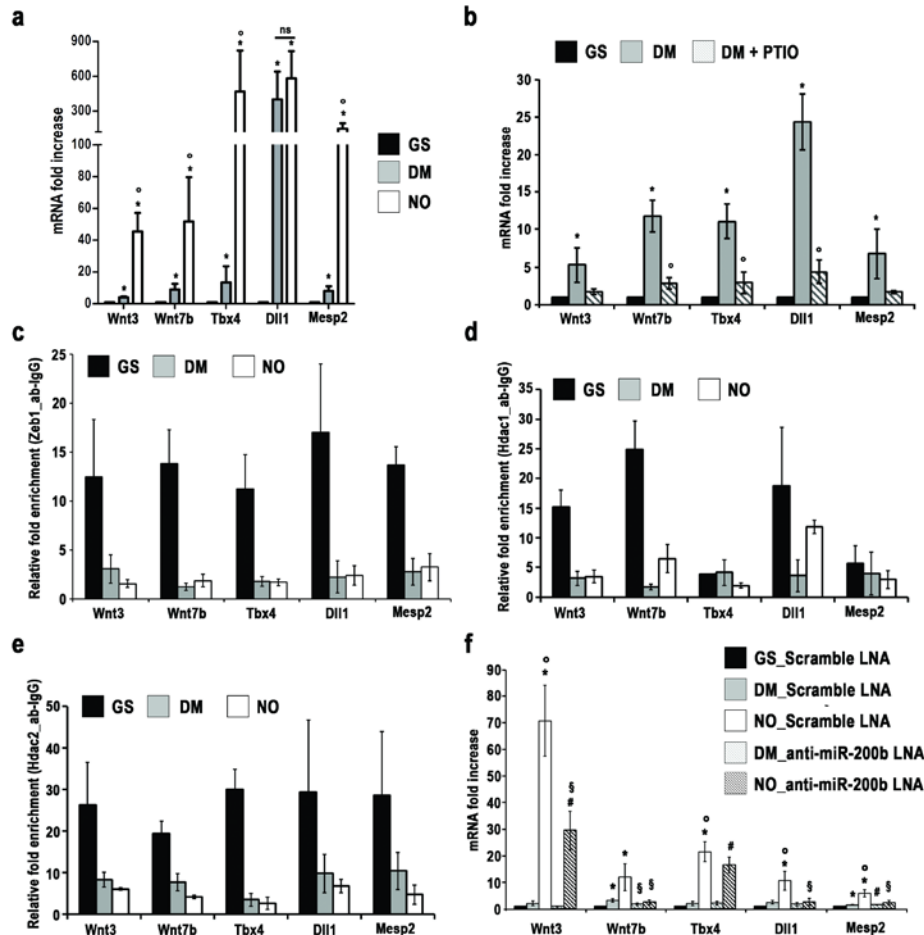

**Supplementary Fig. 4** Gene qRT-PCR validation after integration of RNA-seq and ChIP-seq and analysis of miR-200b inhibition. (a) mRNA expression analysis of Wnt3, Wnt7b, Tbx4, Dll1 and Mesp2 in GS (black bars), DM (grey bars) or NO (white bars). Data represented as mean fold increase  $\pm$ s.e.m. compared to GS after subtraction of the housekeeping gene p0 signal (n=5; \*p < 0.05 vs. GS;  $^{\circ}$ p < 0.05 vs. DM). (b) mRNA expression analysis of Wnt3, Wnt7b, Tbx4, Dll1 and Mesp2 in GS (black bars), DM (grey bars), DM +PTIO (gray striped bars). Data represented as mean fold increase  $\pm$ s.e.m. compared to GS after subtraction of the housekeeping gene p0 signal (n=4; \*p < 0.05 vs. GS;  $^{\circ}$ p < 0.05 vs. DM). (c) ChIP/qRT-PCR of Zeb1 chromatin association on the promoter regions of Wnt3, Wnt7b, Tbx4, Dll1 and Mesp2. Chromatins extracted in GS (black bars), DM (grey bars) or NO (white bars). Data shown as mean fold increase  $\pm$ s.e.m. compared to IgG value after Input normalization (n=3). (d) ChIP/qRT-PCR of Hdac1 chromatin association on the promoter regions of Wnt3, Wnt7b, Tbx4, Dll1 and Mesp2. Chromatins extracted in GS (black bars), DM (grey bars) or NO (white bars). Data shown as mean fold increase  $\pm$ s.e.m. compared to IgG value after Input normalization (n=3). (e) ChIP/qRT-PCR of Hdac2 chromatin association on the promoter regions of Wnt3, Wnt7b, Tbx4, Dll1 and Mesp2. Chromatins extracted in GS (black bars), DM (grey bars) or NO (white bars). Data shown as mean fold increase  $\pm$ s.e.m. compared to IgG value after Input normalization (n=3). (f) mRNA expression analysis of Wnt3, Wnt7b, Tbx4, Dll1 and Mesp2 in GS, DM and NO after nucleofection either with Scramble\_LNA (GS: black bars, DM: grey bars and NO: white bars) or anti-miR-200b\_LNA (DM: grey striped bars and NO: black striped bars). Data represented as mean fold increase  $\pm$ s.e.m. compared to GS\_Scramble LNA after subtraction of the housekeeping gene p0 signal (n=3; \*p < 0.05 vs. GS\_Scramble LNA;  $^{\circ}$ p < 0.05 vs DM\_Scramble LNA; § p < 0.05 anti-miR200b\_LNA vs. Scramble LNA; # p < 0.05 vs. GS\_Scramble LNA). Data analysed by Kolmogorov-Smirnov test.

## Supplementary Fig. 5

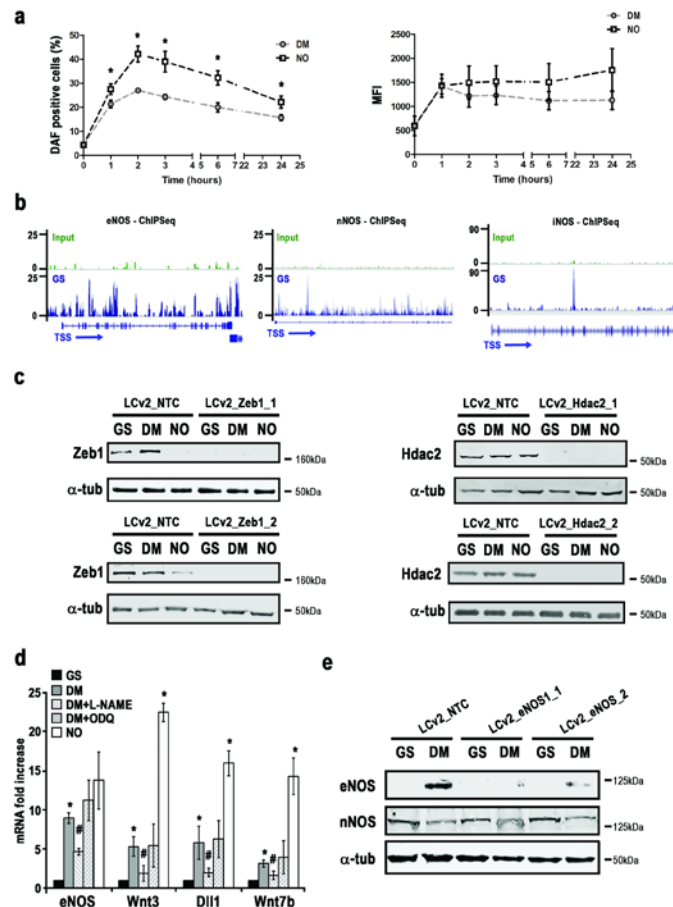

**Supplementary Fig. 5** Zeb1 distribution on NOS promoters and mESC engineering by CRISPR/Cas9. (a) Left panel: percentage of DAF positive mESC cultured 1, 2, 3, 6, 24 h in DM or NO revealed by FACS analysis. Data represented as mean $\pm$ s.e.m. (n=3; \*p<0.05 vs DM). Right panel: DAF mean fluorescence intensity (MFI) measured by FACS analysis in mESC cultured 1, 2, 3, 6, 24 h in DM or NO. Data represented as mean $\pm$ s.d. (n=3). (b) Sashimi plots showing Zeb1 (blue) peak distribution in the naïve mESC genome. Results represented according ChIP-seq data for eNOS (left blue panel), nNOS (middle blue panel) and iNOS (right blue panel) gene promoters. For each sashimi plot data are compared to input (dark green). (c) Left panel: representative western blot analysis showing Zeb1 inactivation in mESC extracts in GS, DM and NO prior (control vector LCv2\_NTC) and after CRISPR/Cas9 inactivation of Zeb1 (LCv2\_Zeb1\_1 upper panels; LCv2\_Zeb1\_2 lower panels). Extracts probed with anti-Zeb1 antibody.  $\alpha$ -tubulin antibody used as loading control for each extract (n=3). Full-length blot provided in Supplementary Fig. 14a. Right panel: representative western blot analysis showing Hdac2 inactivation in mESC extracts in GS, DM and NO prior (control vector LCv2\_NTC) and after CRISPR/Cas9 inactivation of Hdac2 (LCv2\_Hdac2\_1 upper panels; LCv2\_Hdac2\_2 lower panels). Extracts probed with anti-Hdac2 antibody.  $\alpha$ -tubulin used as loading control for each extract (n=3). Full-length blot provided in Supplementary Fig. 14b. (d) mRNA expression analysis of eNOS, Wnt3, Dll1 and Wnt7b in GS (black bars), DM (grey bars), DM + L-NAME (gray striped bars), DM + ODQ (gray squared bars) and NO (white bars). Data represented as mean fold increase  $\pm$ s.e.m. compared to GS after subtraction of the housekeeping gene p0 signal (n=4; \*p<0.05 vs. GS; #p<0.05 vs. DM). (e) Representative western blot analysis showing eNOS inactivation in mESC extracts in GS or DM prior (control vector LCv2\_NTC) and after CRISPR/Cas9 inactivation of eNOS (LCv2\_eNOS\_1 and LCv2\_eNOS\_2). Extracts probed with eNOS and nNOS antibody.  $\alpha$ -tubulin used as loading control for each extract (n=3). Full-length blot provided in Supplementary Fig. 14c. Data analysed by 2 way ANOVA (a) and Kolmogorov-Smirnov test (d).

## Supplementary Fig. 6

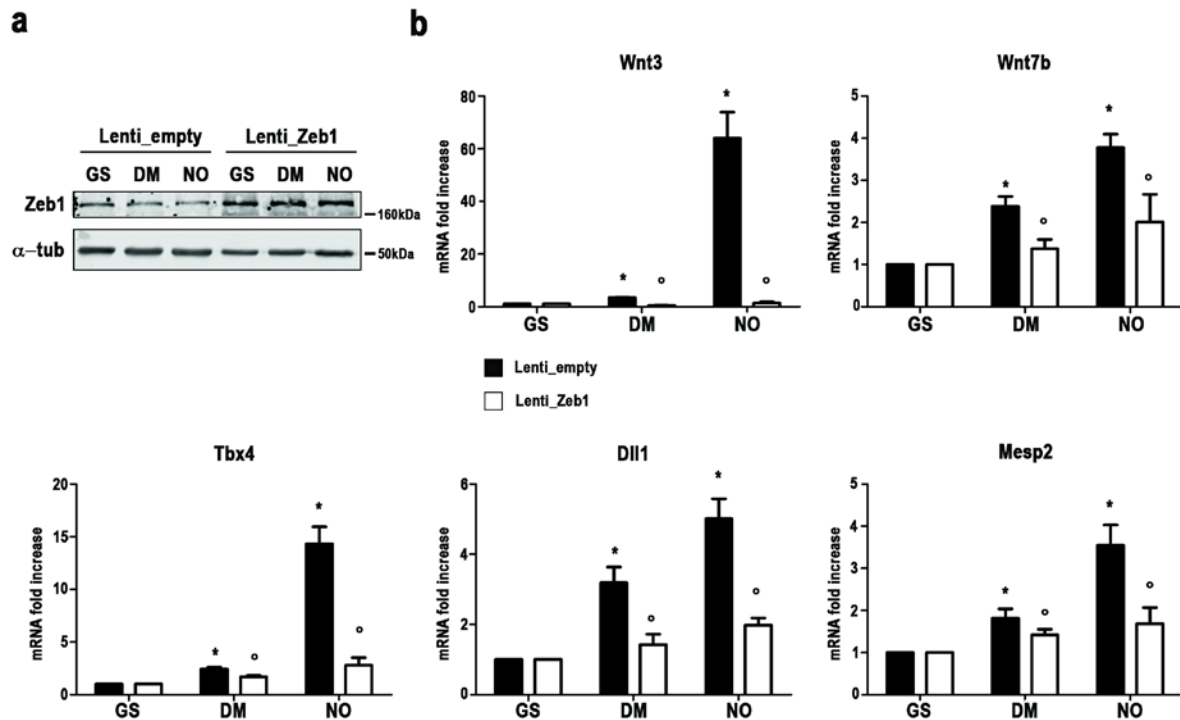

**Supplementary Fig. 6** Zeb1 overexpression contrasts mesendoermal marker expression in released mESC. (a) Representative western blotting analysis of cell extracts obtained from mESC after infection with lentivirus expressing GFP (Lenti\_Empty) or Zeb1 (Lenti\_Zeb1) cultured 24 h in GS, DM and NO probed with Zeb1 antibody. For each extract,  $\alpha$ -tubulin was used as loading control. The experiment was repeated three times. Full-length blot provided in Supplementary Fig. 15a. (b) mRNA expression analysis of Wnt3, Wnt7b, Tbx4, Dll1 and Mesp2 in mESC after infection with lentivirus expressing GFP (Lenti\_Empty) or Zeb1 (Lenti\_Zeb1) cultured 24 h in GS, DM and NO. Data are represented as mean fold increase  $\pm$ s.e.m. compared to GS\_Lenti\_Empty after subtraction of the housekeeping gene p0 signal (n=3; \*p < 0.05 vs. GS\_Lenti\_Empty; <sup>o</sup>p < 0.05 vs. Lenti\_Empty). Data analysed by Kolmogorov-Smirnov test.



## Supplementary Fig. 7

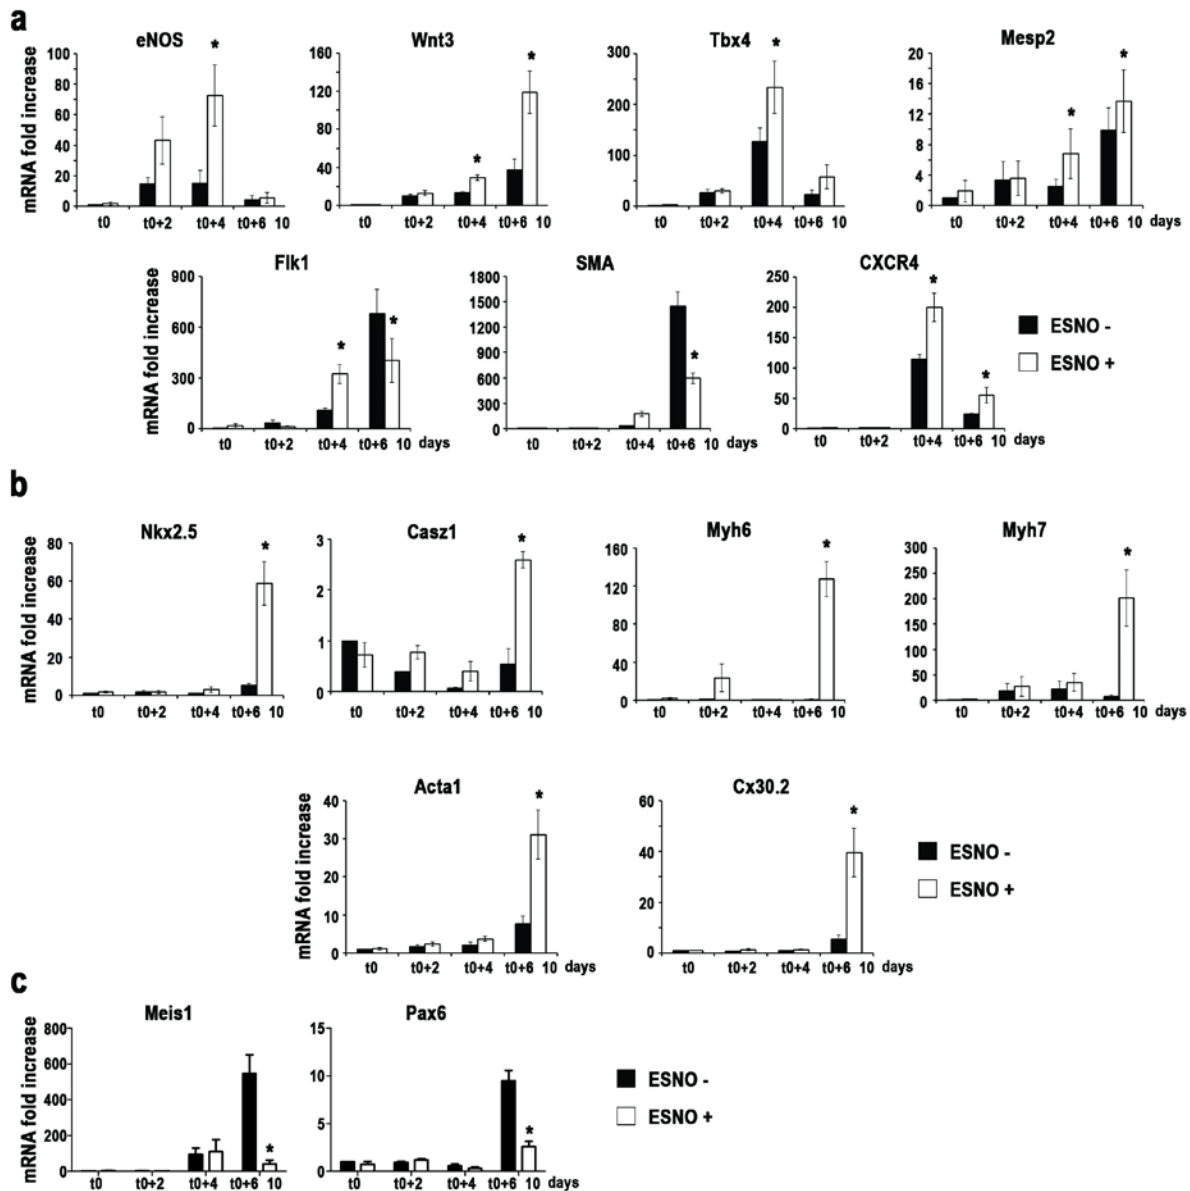

**Supplementary Fig. 7** Gene expression analysis of lineage associated markers in EBs obtained from ESNO+/- cells. (a) qRT-PCR analysis of mesendoderm (Wnt3, Tbx4 and Mesp2) and vascular differentiation-associated markers (eNOS, Fik1, SMA and CXCR4) in total mRNA obtained from ESNO- (black bars) and ESNO+ (white bars) taken at different time points of the EB maturation process. Data are shown as mean  $\pm$ s.e.m. fold increase compared to ESNO- derived EBs after subtraction of the housekeeping p0 gene signal (n=4 each time point; \*p<0.05). (b) qRT-PCR analysis of cardiac associated markers (Nkx2.5, Casz1, Myh6, Acta1 and Cx30.2) in ESNO- (black bars) and ESNO+ (white bars) derived EBs taken at different time points of the EB maturation process. Data are shown as mean  $\pm$ s.e.m. fold increase compared to ESNO- derived EBs after subtraction of the housekeeping p0 gene signal (n=4 each time point; \*p<0.05). (c) qRT-PCR analysis of neuroectodermal associated markers (Meis1 and Pax6) in ESNO- (black bars) and ESNO+ (white bars) derived EBs taken at different time points of the EB maturation process. Data are shown as mean  $\pm$ s.e.m. fold increase compared to ESNO- derived EBs after subtraction of the housekeeping p0 gene signal (n=4 each time point; \*p<0.05). Data analysed by Kolmogorov-Smirnov test.



Supplementary Fig. 8

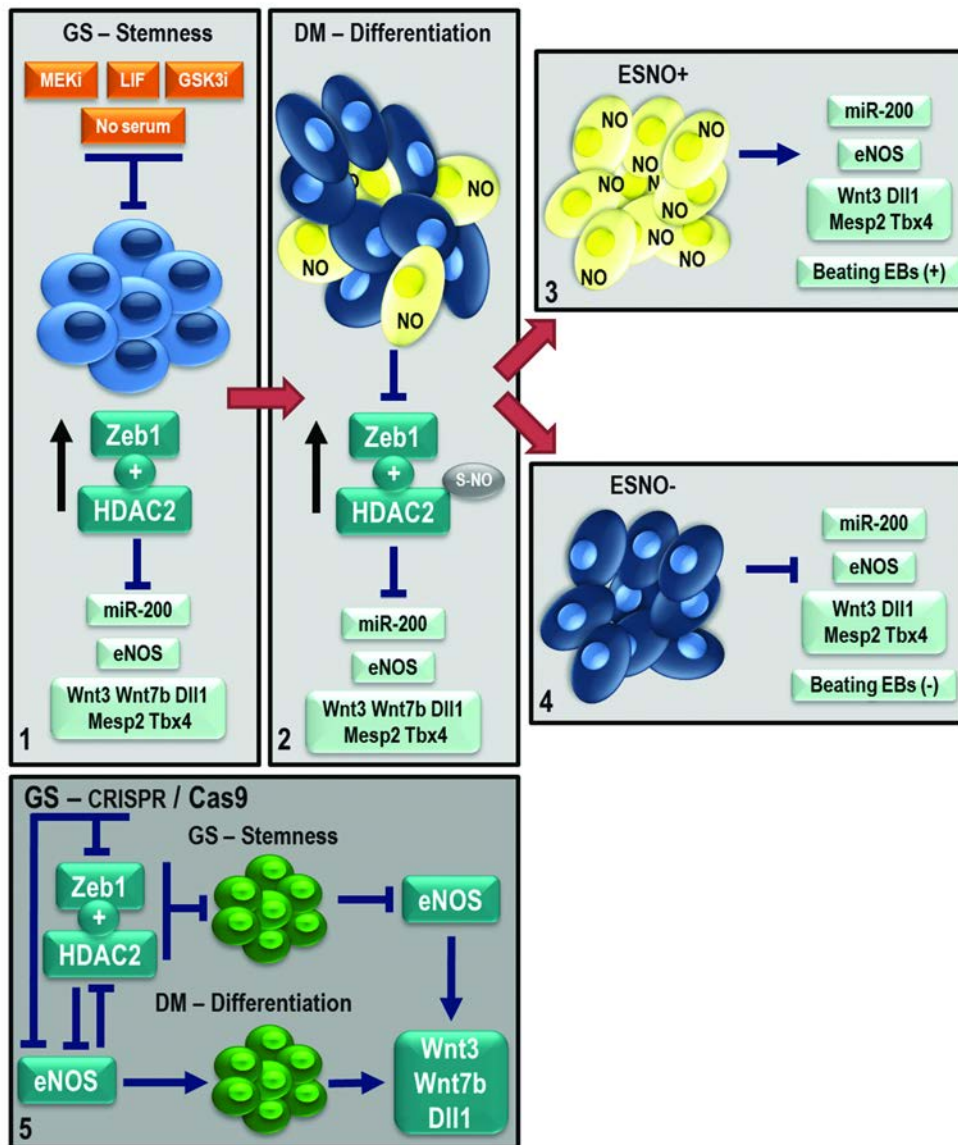

**Supplementary Fig. 8** Schematic representation of the NO-dependent effects in naive and differentiated mESC. In naive mESC, which does not synthesize NO, the Zeb1:Hdac2 complex is bound to chromatin. This condition is associated with the ground state and the repression of lineage specific gene expression (panel 1). NO becomes detectable early after release from GS (DM). In these cells, Hdac2 become S-nitrosylated and the association of Zeb1 to chromatin is significantly reduced. Consistently, genes repressed by Zeb1, including miR-200 family members and transcripts belonging to the mesodermal lineage, are transcribed (panel 2). According to their higher (ESNO+) or lower (ESNO-) level of NO synthesis two mESC populations can be separated. ESNO+ cells express eNOS, mesendodermal/cardiovascular associated markers and form beating EBs (panel 3). ESNO- population remains negative for lineage specific markers and is unable to generate beating EBs (panel 4). Panel 5 shows that CRISPR/Cas9 engineering of naive mESC by inactivating Zeb1 or Hdac2 induces eNOS as well as mesendodermal gene expression in undifferentiated cells. The inactivation of eNOS prevents the expression of mesendoderm-associated markers in mESC cultured in DM.

Supplementary Fig. 9 Related to Fig 3.

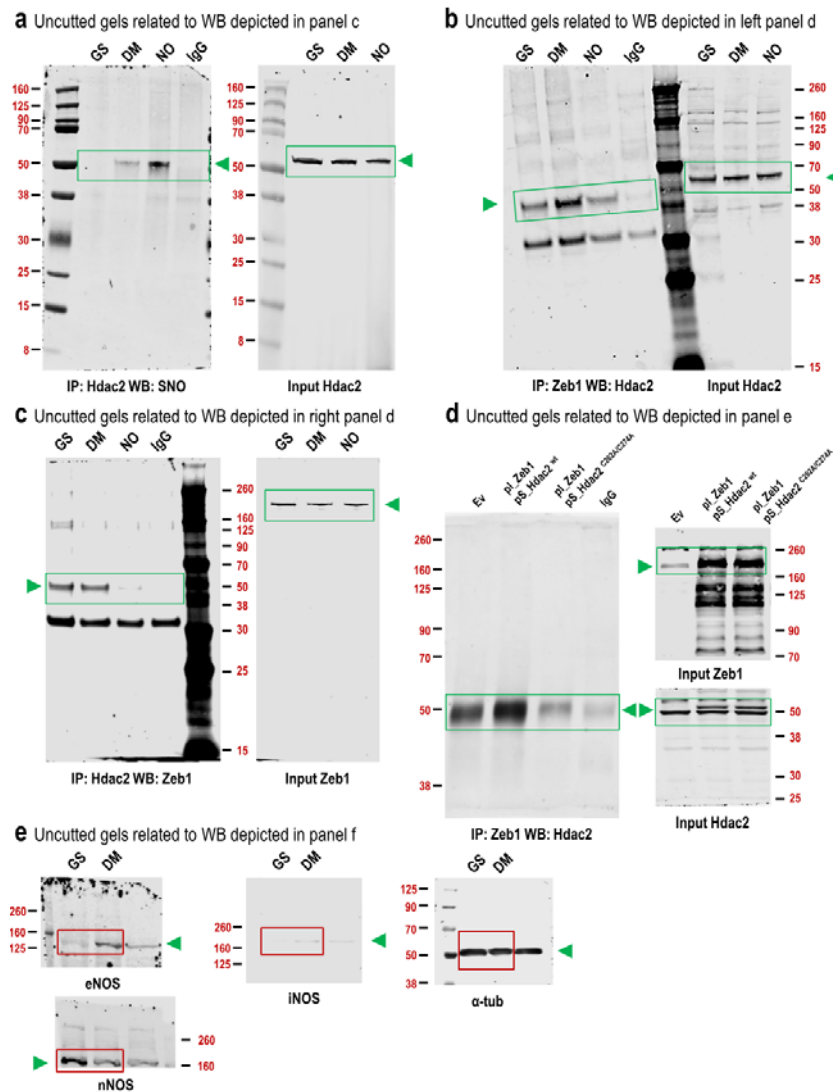

**Supplementary Fig. 9** Full-length images of representative Western blots related to Fig.3. (a) Left panel: whole membrane blot of immunoprecipitation depicted in Fig. 3 panel c. Images of selected portions highlighted in the green frame. Right panel: whole membrane blot of immunoprecipitation input depicted in Fig. 3 panel c. Images of selected portions highlighted in the green frame. (b) Left panel: whole membrane blot of immunoprecipitation depicted in Fig. 3 left panel d. Images of selected portions highlighted in the green frame. Right panel: whole membrane blot of immunoprecipitation input depicted in Fig. 3 left panel d. Images of selected portions highlighted in the green frame. (c) Left panel: whole membrane blot of immunoprecipitation depicted in Fig. 3 right panel d. Images of selected portions highlighted in the green frame. Right panel: whole membrane blot of immunoprecipitation input depicted in Fig. 3 right panel d. Images of selected portions highlighted in the green frame. (d) Left panel: whole membrane blot of immunoprecipitation depicted in Fig. 3 panel e. Images of selected portions highlighted in the green frame. Right panel: whole membrane blot of immunoprecipitation input depicted in Fig. 3 panel e. Images of selected portions highlighted in the green frame. (e) Whole membrane blot of western blotting analysis related to eNOS, nNOS, iNOS and  $\alpha$ -tubulin respectively depicted in Fig. 3 panel f. Images of selected portions highlighted in the red frame.

**Supplementary Fig. 10** Related to Fig 5.

**a** Uncutted gels related to WB depicted in panel c

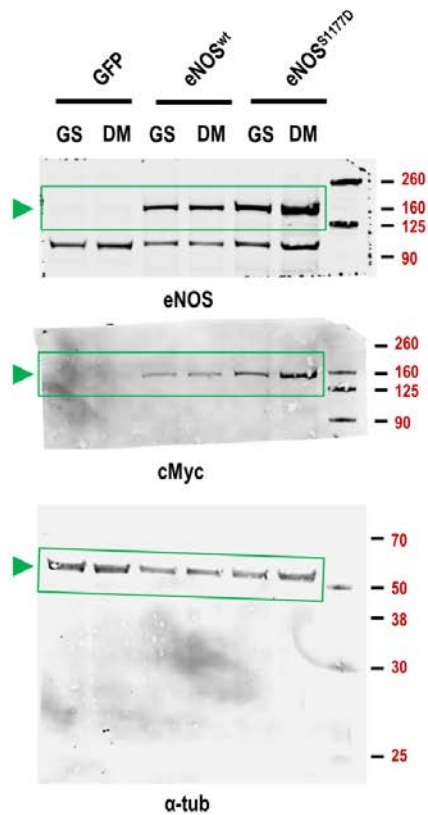

**b** Uncutted gels related to WB depicted in panel d

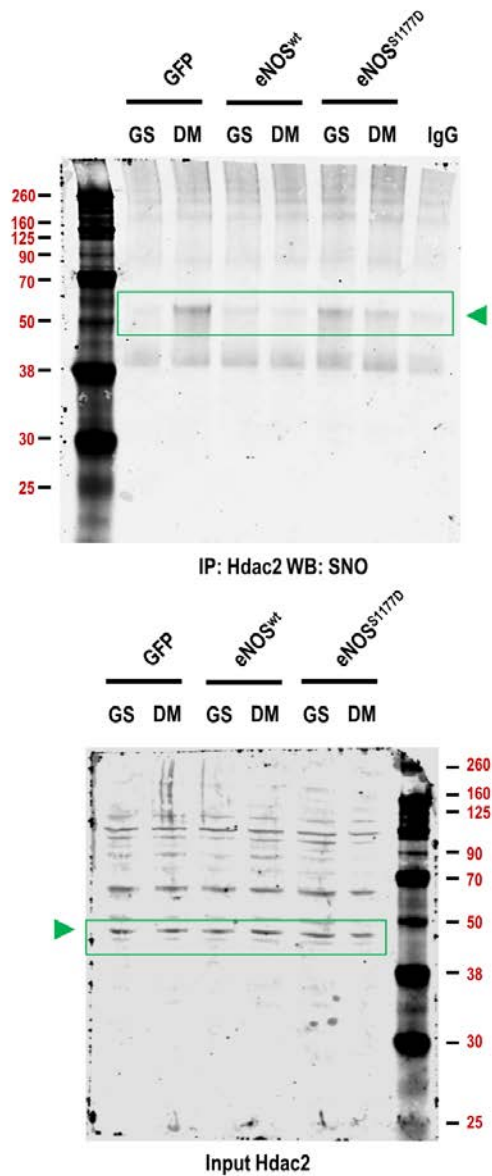

**Supplementary Fig.10** Full-length images of representative Western blots related to Fig 5. **(a)** Whole membrane blot of western blotting analysis related to eNOS, cMyc and α-tubulin respectively depicted in Fig. 5 panel c. Images of selected portions highlighted in the green frame. **(b)** Upper panel: whole membrane blot of immunoprecipitation depicted in Fig. 5 panel d. Images of selected portions highlighted in the green frame. Lower panel: whole membrane blot of immunoprecipitation input depicted in Fig. 5 panel d. Images of selected portions highlighted in the green frame.

**Supplementary Fig. 11** Related to Fig 6.

**a** Uncutted gels related to WB depicted in panel e

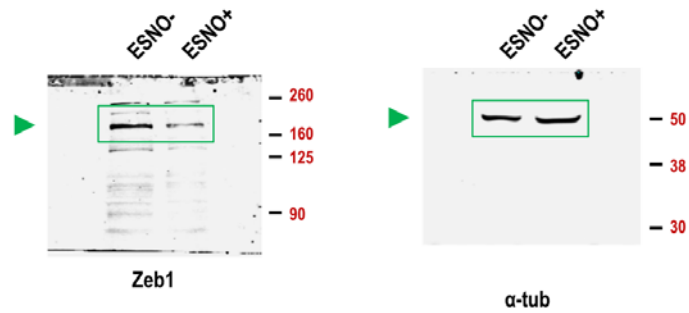

**b** Uncutted gels related to WB depicted in panel f

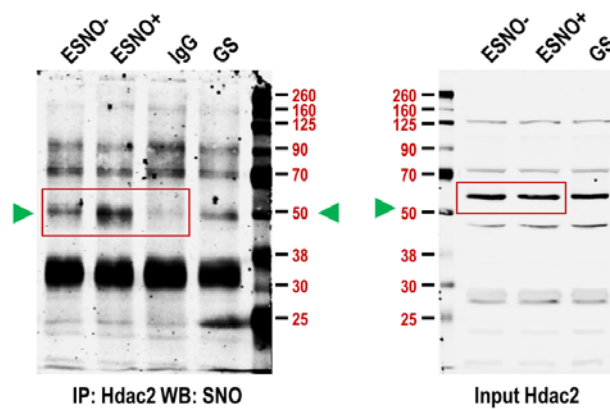

**Supplementary Fig. 11** Full-length images of representative Western blots related to Fig 6. **(a)** Whole membrane blot of western blotting analysis related to Zeb1 and  $\alpha$ -tubulin respectively depicted in Fig. 6 panel e. Images of selected portions highlighted in the green frame. **(b)** Left panel: whole membrane blot of immunoprecipitation depicted in Fig. 6 panel f. Images of selected portions highlighted in the red frame. Right panel: whole membrane blot of immunoprecipitation input depicted in Fig. 6 panel f. Images of selected portions highlighted in the red frame.

**Supplementary Fig. 12** Related to Supplementary Fig 1.

**a** Uncutted gels related to WB depicted in panel b

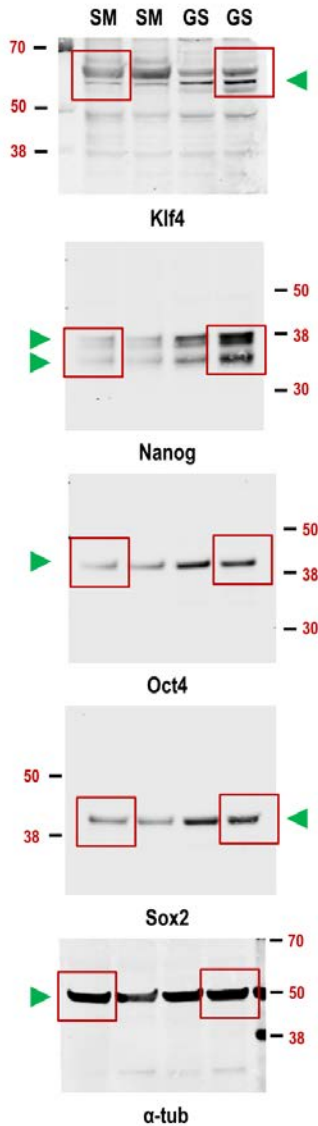

**b** Uncutted gels related to WB depicted in panel e

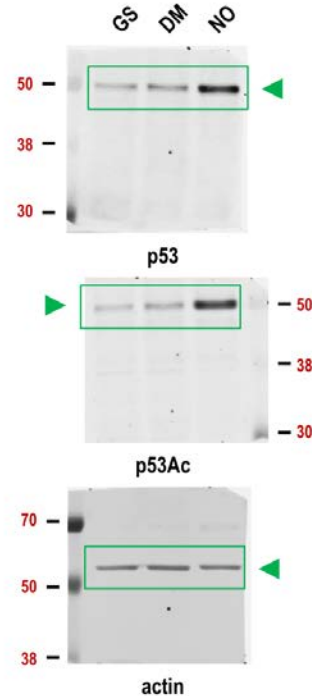

**Supplementary Fig. 12** Full-length images of representative Western blots related to Supplementary Fig 1. (a) Whole membrane blot of western blotting analysis related to Klf4, Nanog, Oct4, Sox2 and  $\alpha$ -tubulin respectively depicted in Suppl. Fig. 1 panel b. Images of selected portions highlighted in the red frame. (b) Whole membrane blot of western blotting analysis related to p53, p53Ac and actin respectively depicted in Suppl. Fig. 1 panel e. Images of selected portions highlighted in the green frame.

**Supplementary Fig. 13** Related to Supplementary Fig 3.

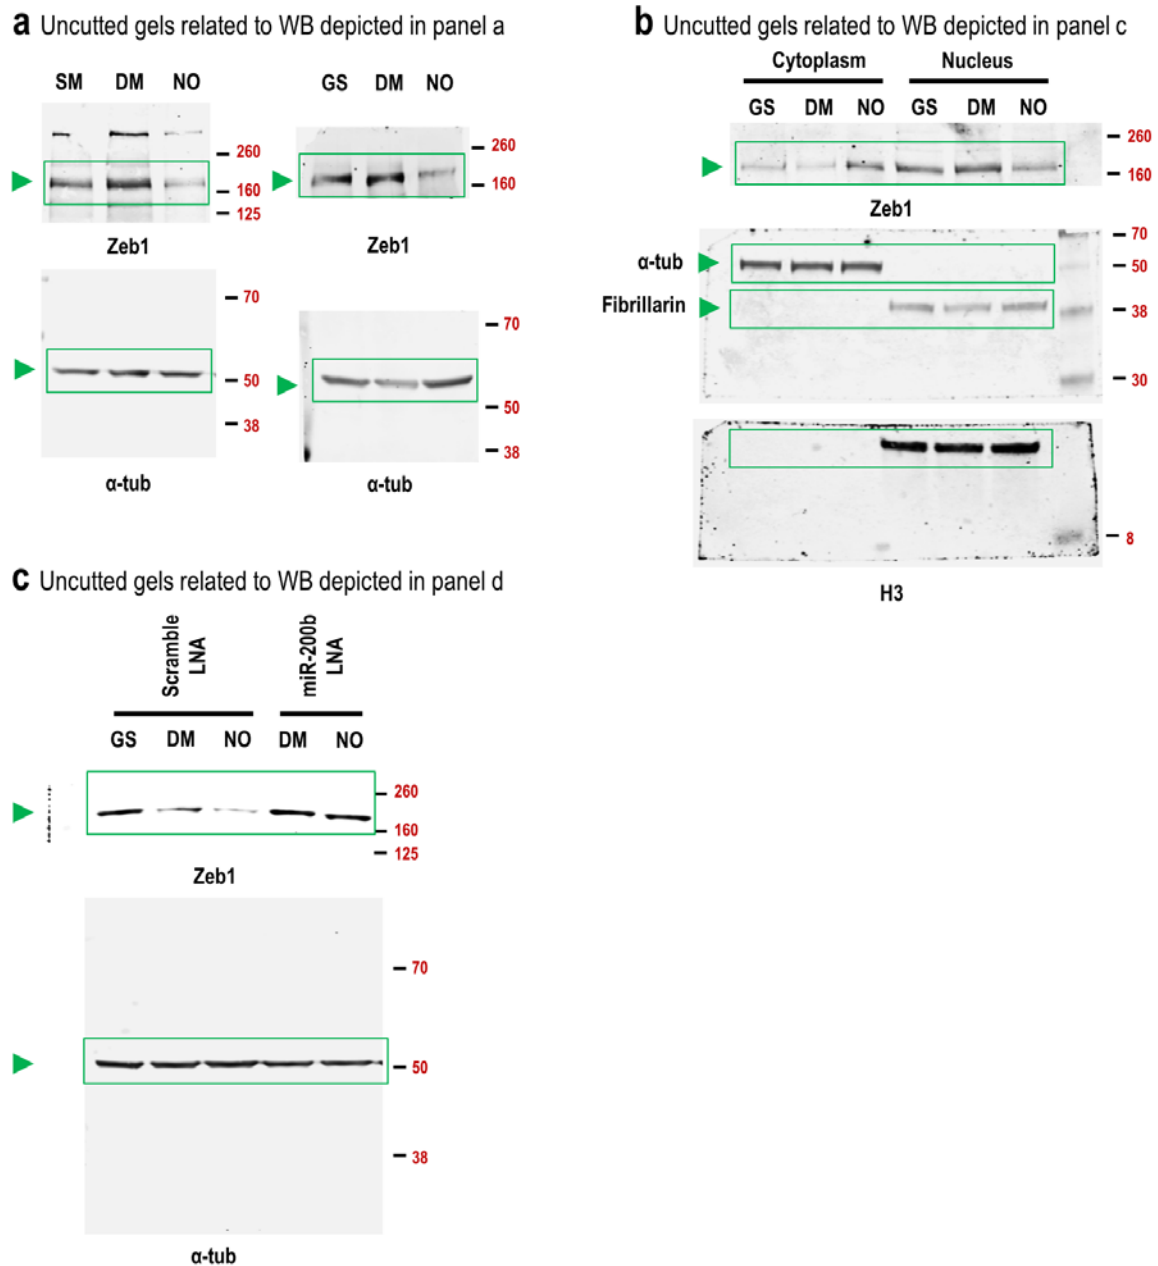

**Supplementary Fig. 13** Full-length images of representative Western blots related to Supplementary Fig 3. **(a)** Whole membrane blot of western blotting analysis related to Zeb1 and  $\alpha$ -tubulin respectively depicted in Suppl. Fig. 2 panel a. Images of selected portions highlighted in the green frame. **(b)** Whole membrane blot of western blotting analysis related to Zeb1 and  $\alpha$ -tubulin respectively depicted in Suppl. Fig. 2 panel b. Images of selected portions highlighted in the green frame. **(c)** Whole membrane blot of western blotting analysis related to Zeb1,  $\alpha$ -tubulin, Fibrillarin and H3 respectively depicted in Suppl. Fig. 2 panel c. Images of selected portions highlighted in the green frame.



**Supplementary Fig. 14** Related to Supplementary Fig 5.

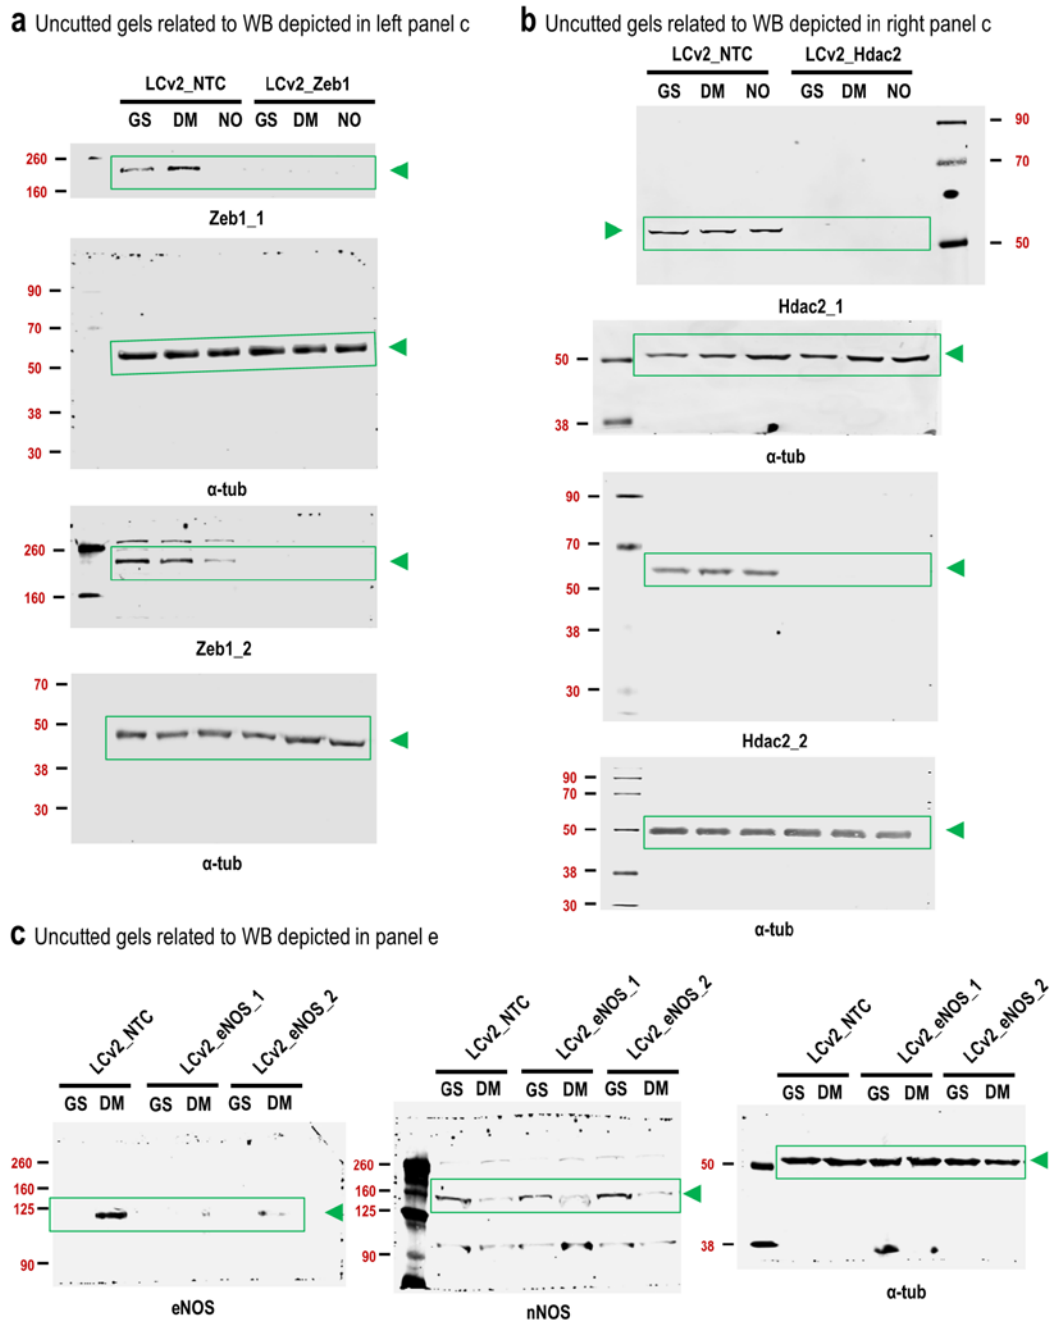

**Supplementary Fig. 14** Full-length images of representative Western blots related to Supplementary Fig 5. **(a)** Whole membrane blot of western blotting analysis related to Zeb1 and  $\alpha$ -tubulin respectively depicted in Suppl. Fig. 5 left panel c. Images of selected portions highlighted in the green frame. Upper panels related to LCv2\_Zeb1\_1 and lower panels related to LCv2\_Zeb1\_2 both compared to LCv2\_NTC. **(b)** Whole membrane blot of western blotting analysis related to Hdac2 and  $\alpha$ -tubulin respectively depicted in Suppl. Fig. 5 right panel c. Images of selected portions highlighted in the green frame. Upper panels related to LCv2\_Hdac2\_1 and lower panels related to LCv2\_Hdac2\_2 both compared to LCv2\_NTC. **(c)** Whole membrane blot of western blotting analysis related to eNOS, nNOS and  $\alpha$ -tubulin respectively depicted in Suppl. Fig. 5 panel e. Images of selected portions highlighted in the green frame.



**Supplementary Fig. 15** Related to Supplementary Fig 6.

**a** Uncutted gels related to WB depicted in panel a

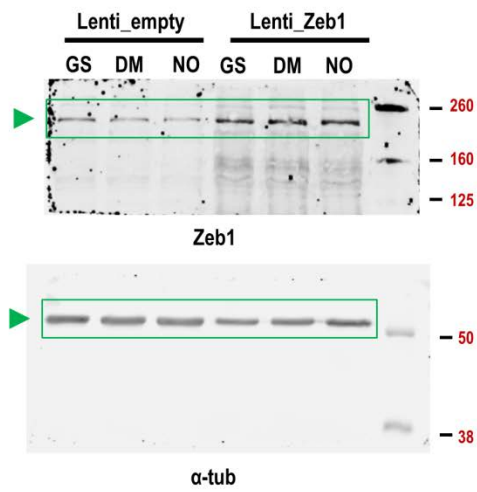

**Supplementary Fig. 15** Full-length images of representative Western blots related to Supplementary Fig 6. (a) Whole membrane blot of western blotting analysis related to Zeb1 and  $\alpha$ -tubulin respectively depicted in Suppl. Fig. 6 panel a. Images of selected portions highlighted in the green frame.

## Supplementary tables

Supplementary Table 1. General sequencing statistics

| Sample                | Experiment | Raw Reads [#] | Trimmed Reads [#] | Mean Length Trimmed Reads [nt] | Mapped Reads [#] |
|-----------------------|------------|---------------|-------------------|--------------------------------|------------------|
| GS_1                  | RNA Seq    | 45773515      | 41440710          | 111                            | 32764129         |
| GS_2                  | RNA Seq    | 60336017      | 54614154          | 106                            | 39649345         |
| GS_3                  | RNA Seq    | 37234577      | 34938551          | 115                            | 27307705         |
| DM <sup>GS</sup> _1   | RNA Seq    | 51692848      | 46676326          | 110                            | 38380896         |
| DM <sup>GS</sup> _2   | RNA Seq    | 63964694      | 58385924          | 101                            | 47875495         |
| DM <sup>GS</sup> _3   | RNA Seq    | 50253980      | 42234799          | 109                            | 34039478         |
| DM <sup>GSNO</sup> _1 | RNA Seq    | 59883454      | 55809069          | 119                            | 45833565         |
| DM <sup>GSNO</sup> _2 | RNA Seq    | 40472427      | 36594367          | 107                            | 26592224         |
| DM <sup>GSNO</sup> _3 | RNA Seq    | 41609238      | 34676920          | 109                            | 25606368         |
| GS_ctrl_1 Input       | ChIP Seq   | 50657015      | 49386645          | 116                            | 23162440         |
| GS_Zeb1_1 Zeb1_IP     | ChIP Seq   | 38415268      | 37519506          | 113                            | 19823308         |
| GS_Zeb1_2 Zeb1_IP     | ChIP Seq   | 30630621      | 30043393          | 115                            | 20762694         |
| GS_Zeb1_3 Zeb1_IP     | ChIP Seq   | 30909628      | 30244202          | 114                            | 19787120         |

**Supplementary Table 2.** List of selected genes regulated in each group depicted in Fig. 1A.

| Ensembl Gene Id    | Gene Name     | UniProt Protein Description                                       | Chr | Gene Start | Gene End  | Str |
|--------------------|---------------|-------------------------------------------------------------------|-----|------------|-----------|-----|
| ENSMUSG00000038242 | Aox4          | Aldehyde oxidase 4                                                | 1   | 58210397   | 58268597  | +   |
| ENSMUSG00000026173 | Plcd4         | 1-phosphatidylinositol 4,5-bisphosphate phosphodiesterase delta-4 | 1   | 74542888   | 74567794  | +   |
| ENSMUSG00000033227 | Wnt6          | Protein Wnt-6                                                     | 1   | 74771892   | 74785322  | +   |
| ENSMUSG00000026249 | Serpine2      | Glia-derived nexin                                                | 1   | 79794197   | 79861180  | -   |
| ENSMUSG00000084989 | E030010N08Rik | Protein E030010N08Rik                                             | 1   | 93168725   | 93231072  | +   |
| ENSMUSG00000047793 | Sned1         | Sushi, nidogen and EGF-like domain-containing protein 1           | 1   | 93235841   | 93301065  | +   |
| ENSMUSG00000042268 | Slc26a9       | Solute carrier family 26 member 9                                 | 1   | 131744022  | 131771504 | +   |
| ENSMUSG00000097993 | Ptpv          |                                                                   | 1   | 135108497  | 135132594 | -   |
| ENSMUSG00000006411 | Pvr14         | Poliovirus receptor-related protein 4                             | 1   | 171370099  | 171388598 | +   |
| ENSMUSG00000075304 | Sp5           | Transcription factor Sp5                                          | 2   | 70474923   | 70477729  | +   |
| ENSMUSG00000074968 | Ano3          | Anoctamin                                                         | 2   | 110655201  | 110950923 | -   |
| ENSMUSG00000040093 | Bmf           | Bcl-2-modifying factor                                            | 2   | 118528757  | 118549687 | -   |
| ENSMUSG00000027400 | Pdyn          | Proenkephalin-B                                                   | 2   | 129686565  | 129699844 | -   |
| ENSMUSG00000027401 | Tgm3          | Protein-glutamine gamma-glutamyltransferase E                     | 2   | 130012349  | 130050399 | +   |
| ENSMUSG00000027356 | Fermt1        | Fermitin family homolog 1                                         | 2   | 132904389  | 132945906 | -   |
| ENSMUSG00000053141 | Ptprt         | Receptor-type tyrosine-protein phosphatase T                      | 2   | 161521990  | 162661147 | -   |
| ENSMUSG00000017817 | Jph2          | Junctophilin-2                                                    | 2   | 163336242  | 163397993 | -   |
| ENSMUSG00000017697 | Ada           | Adenosine deaminase                                               | 2   | 163726584  | 163750239 | -   |
| ENSMUSG00000028640 | Tfap2c        | Transcription factor AP-2 gamma                                   | 2   | 172549593  | 172558622 | +   |
| ENSMUSG00000027570 | Col9a3        | Procollagen                                                       | 2   | 180597790  | 180622189 | +   |
| ENSMUSG00000027580 | Helz2         | Helicase with zinc finger domain 2                                | 2   | 181227615  | 181242027 | -   |
| ENSMUSG00000069114 | Zbtb10        | Protein Zbtb10                                                    | 3   | 9250602    | 9285333   | +   |
| ENSMUSG00000045092 | S1pr1         | Sphingosine 1-phosphate receptor 1                                | 3   | 115710433  | 115715072 | -   |
| ENSMUSG00000040998 | Npnt          | Nephronectin                                                      | 3   | 132881745  | 132950291 | -   |
| ENSMUSG00000028435 | Aqp3          | Aquaporin-3                                                       | 4   | 41092722   | 41098183  | -   |
| ENSMUSG00000028487 | Bnc2          | Zinc finger protein basonuclin-2                                  | 4   | 84275095   | 84675275  | -   |

|                     |                   |                                                                             |   |           |           |   |
|---------------------|-------------------|-----------------------------------------------------------------------------|---|-----------|-----------|---|
| ENSMUSG00000006386  | Tek               | Angiopoietin-1 receptor<br>Endothelial-specific receptor<br>tyrosine kinase | 4 | 94739289  | 94874976  | + |
| ENSMUSG00000028789  | Adc               | Antizyme inhibitor 2                                                        | 4 | 128930233 | 128962442 | - |
| ENSMUSG00000040533  | Matn1             | Cartilage matrix protein                                                    | 4 | 130944385 | 130955475 | + |
| ENSMUSG00000028860  | Syt11             | Synaptotagmin-like protein 1                                                | 4 | 133253090 | 133263113 | - |
| ENSMUSG00000029055  | Plch2             | 1-phosphatidylinositol 4,5-<br>bisphosphate<br>phosphodiesterase eta-2      | 4 | 154983115 | 155056784 | - |
| ENSMUSG00000034981  | Parm1             | Prostate androgen-regulated<br>mucin-like protein 1 homolog                 | 5 | 91517615  | 91626894  | + |
| ENSMUSG00000034842  | Art3              | Ecto-ADP-ribosyltransferase 3                                               | 5 | 92331827  | 92414628  | + |
| ENSMUSG00000042078  | Svop              | Synaptic vesicle 2-related<br>protein                                       | 5 | 114026910 | 114091570 | - |
| ENSMUSG00000024211  | Grm8              | Metabotropic glutamate<br>receptor 8                                        | 6 | 27275119  | 28135178  | - |
| ENSMUSG00000003476  | Crhr2             | Corticotropin-releasing factor<br>receptor 2                                | 6 | 55090049  | 55133016  | - |
| ENSMUSG00000030064  | Frmd4b            | FERM domain-containing<br>protein 4B                                        | 6 | 97286867  | 97617541  | - |
| ENSMUSG00000035357  | Pdzrn3            | E3 ubiquitin-protein ligase<br>PDZRN3                                       | 6 | 101149609 | 101377897 | - |
| ENSMUSG00000030111  | A2m               | Alpha-2-macroglobulin-P                                                     | 6 | 121635376 | 121679227 | + |
| ENSMUSG00000078776  | 9530053<br>A07Rik | Protein 9530053A07Rik                                                       | 7 | 28129466  | 28164811  | + |
| ENSMUSG00000036915  | Kirrel2           | Kin of IRRE-like protein 2                                                  | 7 | 30447534  | 30457690  | - |
| ENSMUSG00000009487  | Otog              | Otogelin                                                                    | 7 | 46240987  | 46311434  | + |
| ENSMUSG00000030523  | Trpm1             | Transient receptor potential<br>cation channel subfamily M<br>member 1      | 7 | 64153835  | 64269775  | + |
| ENSMUSG00000035314  | Gdpd5             | Glycerophosphodiester<br>phosphodiesterase domain-<br>containing protein 5  | 7 | 99381549  | 99460983  | + |
| ENSMUSG00000005686  | Ampd3             | AMP deaminase 3                                                             | 7 | 110768206 | 110812405 | + |
| ENSMUSG00000030669  | Calca             | Calcitonin                                                                  | 7 | 114631478 | 114636357 | - |
| ENSMUSG000000051457 | Spn               | Leukosialin                                                                 | 7 | 127132232 | 127137823 | - |
| ENSMUSG00000048528  | Nkx1-2            | NK1 transcription factor-<br>related protein 2                              | 7 | 132594878 | 132599637 | - |
| ENSMUSG00000041309  | Nkx6-2            | NK6 transcription factor<br>related                                         | 7 | 139579376 | 139582797 | - |
| ENSMUSG00000066129  | Kndc1             | Protein very KIND                                                           | 7 | 139894696 | 139941537 | + |
| ENSMUSG00000025473  | Adam8             | Disintegrin and<br>metalloproteinase domain-<br>containing protein 8        | 7 | 139978932 | 139992562 | - |
| ENSMUSG00000031502  | Col4a1            | Collagen alpha-1(IV) chain                                                  | 8 | 11198423  | 11312826  | - |

|                    |                |                                                                     |    |           |           |   |
|--------------------|----------------|---------------------------------------------------------------------|----|-----------|-----------|---|
| ENSMUSG00000031549 | Ido2           | Indoleamine 2,3-dioxygenase 2                                       | 8  | 24531894  | 24576333  | - |
| ENSMUSG00000031530 | Dusp4          | Dual specificity protein phosphatase 4                              | 8  | 34807297  | 34819894  | + |
| ENSMUSG00000045333 | Zfp423         | Zinc finger protein 423 Zinc finger protein 423                     | 8  | 87661810  | 87959595  | - |
| ENSMUSG00000074151 | Nlrc5          | Protein NLRC5                                                       | 8  | 94472763  | 94527272  | + |
| ENSMUSG00000031886 | Ces2e          | Pyrethroid hydrolase Ces2e                                          | 8  | 104926260 | 104934672 | + |
| ENSMUSG00000043251 | Exoc3l         | Exocyst complex component 3-like protein                            | 8  | 105289924 | 105296098 | - |
| ENSMUSG00000032118 | Fez1           | Fasciculation and elongation protein zeta-1                         | 9  | 36821939  | 36878924  | + |
| ENSMUSG00000032125 | Robo4          | Roundabout homolog 4                                                | 9  | 37401897  | 37414023  | + |
| ENSMUSG00000049281 | Scn3b          | Sodium channel subunit beta-3                                       | 9  | 40269216  | 40291618  | + |
| ENSMUSG00000032135 | Mcam           | Cell surface glycoprotein MUC18                                     | 9  | 44134469  | 44142727  | + |
| ENSMUSG00000032087 | Dscam1l        | Down syndrome cell adhesion molecule-like protein 1 homolog         | 9  | 45430293  | 45753164  | + |
| ENSMUSG00000032060 | Cryab          | Alpha-crystallin B chain                                            | 9  | 50752758  | 50756633  | + |
| ENSMUSG00000032232 | Cgnl1          | Cingulin-like 1 Cingulin-like protein 1                             | 9  | 71626509  | 71771602  | - |
| ENSMUSG00000086236 | 5830418 P13Rik |                                                                     | 9  | 103423578 | 103461260 | + |
| ENSMUSG00000032591 | Mst1           | Hepatocyte growth factor-like protein                               | 9  | 108080436 | 108085003 | + |
| ENSMUSG00000039115 | Itga9          | Protein Itga9                                                       | 9  | 118606690 | 118901003 | + |
| ENSMUSG00000019817 | Plagl1         | Protein Plagl1                                                      | 10 | 13060504  | 13131694  | + |
| ENSMUSG00000019851 | Perp           | p53 apoptosis effector related to PMP-22                            | 10 | 18845071  | 18857073  | + |
| ENSMUSG00000037440 | Vnn1           | Pantetheinase                                                       | 10 | 23894688  | 23905343  | + |
| ENSMUSG00000019989 | Enpp3          | Ectonucleotide pyrophosphatase/phosphodiesterase family member 3    | 10 | 24773814  | 24836195  | - |
| ENSMUSG00000038916 | Soga3          | Protein SOGA3                                                       | 10 | 29143996  | 29199630  | + |
| ENSMUSG00000000731 | Aire           | Autoimmune regulator                                                | 10 | 78030022  | 78043610  | - |
| ENSMUSG00000005355 | Casp14         | Caspase-14                                                          | 10 | 78711997  | 78718293  | - |
| ENSMUSG00000004359 | Spic           | Transcription factor Spi-C                                          | 10 | 88674772  | 88685015  | - |
| ENSMUSG00000058589 | Anks1b         | Ankyrin repeat and sterile alpha motif domain-containing protein 1B | 10 | 89873509  | 90973300  | + |
| ENSMUSG00000019960 | Dusp6          | Dual specificity protein phosphatase 6                              | 10 | 99263231  | 99267488  | + |
| ENSMUSG00000025407 | Gli1           | Zinc finger protein GLI1                                            | 10 | 127329889 | 127341589 | - |

|                     |               |                                                                                  |    |           |           |   |
|---------------------|---------------|----------------------------------------------------------------------------------|----|-----------|-----------|---|
| ENSMUSG00000020122  | Egfr          | Epidermal growth factor receptor                                                 | 11 | 16752203  | 16918158  | + |
| ENSMUSG00000018339  | Gpx3          | Glutathione peroxidase                                                           | 11 | 54902453  | 54910377  | + |
| ENSMUSG00000005951  | Shpk          | Sedoheptulokinase                                                                | 11 | 73199460  | 73224511  | + |
| ENSMUSG00000017390  | Aldoc         | Fructose-bisphosphate aldolase C                                                 | 11 | 78322968  | 78327781  | + |
| ENSMUSG00000018845  | Unc45b        | Protein unc-45 homolog B                                                         | 11 | 82910550  | 82943403  | + |
| ENSMUSG00000001555  | Fkbp10        | Peptidyl-prolyl cis-trans isomerase FKBP10                                       | 11 | 100415697 | 100424824 | + |
| ENSMUSG00000019326  | Aoc3          | Membrane primary amine oxidase                                                   | 11 | 101330605 | 101341938 | + |
| ENSMUSG00000025161  | Slc16a3       | Monocarboxylate transporter 4                                                    | 11 | 120948480 | 120960868 | + |
| ENSMUSG00000020598  | Nrcam         | Neuronal cell adhesion molecule                                                  | 12 | 44328885  | 44601846  | + |
| ENSMUSG00000035105  | Egln3         | Egl nine homolog 3                                                               | 12 | 54178981  | 54203860  | - |
| ENSMUSG00000021298  | Gpr132        | Probable G-protein coupled receptor 132                                          | 12 | 112850876 | 112860916 | - |
| ENSMUSG00000004341  | Gpx6          | Glutathione peroxidase 6                                                         | 13 | 21312217  | 21319624  | + |
| ENSMUSG000000051335 | Gfod1         | Glucose-fructose oxidoreductase domain-containing protein 1                      | 13 | 43195519  | 43304172  | - |
| ENSMUSG000000042102 | Dmgdh         | Dimethylglycine dehydrogenase                                                    | 13 | 93674433  | 93752831  | + |
| ENSMUSG00000021662  | Arhgef28      | Rho guanine nucleotide exchange factor 28 Rho-guanine nucleotide exchange factor | 13 | 97898595  | 98206165  | - |
| ENSMUSG00000021950  | Anxa8         | Annexin A8                                                                       | 14 | 34085981  | 34100571  | + |
| ENSMUSG00000021848  | Otx2          | Homeobox protein OTX2                                                            | 14 | 48657679  | 48667644  | - |
| ENSMUSG00000000958  | Slc7a7        | Y+L amino acid transporter 1                                                     | 14 | 54369442  | 54417780  | - |
| ENSMUSG00000022091  | Sorbs3        | Vinexin                                                                          | 14 | 70180468  | 70207637  | - |
| ENSMUSG00000033644  | Piwi2         | Piwi-like protein 2                                                              | 14 | 70372480  | 70429094  | - |
| ENSMUSG00000022096  | Hr            | Protein hairless                                                                 | 14 | 70552212  | 70573548  | + |
| ENSMUSG00000005360  | Slc1a3        | Excitatory amino acid transporter 1                                              | 15 | 8634124   | 8710764   | - |
| ENSMUSG00000022197  | Pdzd2         | Protein Pdzd2                                                                    | 15 | 12359711  | 12739924  | - |
| ENSMUSG00000022286  | Grhl2         | Grainyhead-like protein 2 homolog                                                | 15 | 37233036  | 37363569  | + |
| ENSMUSG000000058099 | Nfam1         | NFAT activation molecule 1                                                       | 15 | 82997721  | 83033306  | - |
| ENSMUSG000000062760 | 1810041L15Rik | Protein 1810041L15Rik                                                            | 15 | 84379203  | 84447097  | - |
| ENSMUSG000000037353 | Letmd1        | LETM1 domain-containing protein 1                                                | 15 | 100469034 | 100479252 | + |
| ENSMUSG000000043391 | 2510009E07Rik | UPF0524 protein C3orf70 homolog                                                  | 16 | 21649045  | 21694665  | - |

|                    |               |                                                              |    |           |           |   |
|--------------------|---------------|--------------------------------------------------------------|----|-----------|-----------|---|
| ENSMUSG00000022912 | Pros1         | Vitamin K-dependent protein S                                | 16 | 62854307  | 62929346  | + |
| ENSMUSG00000041134 | Cyyr1         | Cysteine and tyrosine-rich protein 1                         | 16 | 85421533  | 85553397  | - |
| ENSMUSG00000005251 | Ripk4         | Receptor-interacting serine/threonine-protein kinase 4       | 16 | 97741933  | 97763737  | - |
| ENSMUSG00000023827 | Agpat4        | 1-acyl-sn-glycerol-3-phosphate acyltransferase delta         | 17 | 12118704  | 12219645  | + |
| ENSMUSG00000037321 | Tap1          | Antigen peptide transporter 1                                | 17 | 34187553  | 34197225  | + |
| ENSMUSG00000073418 | C4b           | Complement C4-B                                              | 17 | 34728380  | 34743882  | - |
| ENSMUSG00000023913 | Pla2g7        | Platelet-activating factor acetylhydrolase                   | 17 | 43568098  | 43612201  | + |
| ENSMUSG00000039193 | Nlrc4         | NLR family CARD domain-containing protein 4                  | 17 | 74426295  | 74459108  | - |
| ENSMUSG00000024427 | Spry4         | Protein sprouty homolog 4                                    | 18 | 38586268  | 38601268  | - |
| ENSMUSG00000024619 | Cdx1          | Homeobox protein CDX-1                                       | 18 | 61018862  | 61036199  | - |
| ENSMUSG00000046318 | Ccbe1         | Collagen and calcium-binding EGF domain-containing protein 1 | 18 | 66045302  | 66302739  | - |
| ENSMUSG00000036098 | Myrf          | Myelin regulatory factor                                     | 19 | 10208272  | 10240748  | - |
| ENSMUSG00000031160 | Eras          | GTPase ERas                                                  | X  | 7924276   | 7928607   | - |
| ENSMUSG00000002006 | Pdzd4         | PDZ domain-containing protein 4                              | X  | 73793359  | 73824969  | - |
| ENSMUSG00000046774 | 8030474K03Rik | Protein 8030474K03Rik                                        | X  | 101794656 | 101798642 | + |
| ENSMUSG00000009596 | Taf7l         | Transcription initiation factor TFIID subunit 7-like         | X  | 134460118 | 134476490 | - |

(basemean >5, fdr < 0.05, log2fc > ± 2x )



**Supplementary Table 3.** EB diameter measures.

|                | <b>t0 + 2 days</b>   |                      | <b>t0 + 6 days</b>   |                      |
|----------------|----------------------|----------------------|----------------------|----------------------|
|                | <b>DAF - EBs</b>     | <b>DAF + EBs</b>     | <b>DAF - EBs</b>     | <b>DAF + EBs</b>     |
| <b>Average</b> | 223.46 $\mu\text{m}$ | 350.61 $\mu\text{m}$ | 527.54 $\mu\text{m}$ | 793.02 $\mu\text{m}$ |
| <b>SE</b>      | 70.54                | 24.54                | 138.95               | 168.40               |
| <b>N</b>       | 20                   | 30                   | 12                   | 12                   |
| <b>p</b>       | 0.05 (*)             |                      | 0.11                 |                      |

**Supplementary Table 4.** Antibody list

| <b>Antibody</b>              | <b>Company</b>   | <b>Cat. number</b> | <b>Host</b> | <b>Clonality</b> | <b>Application</b> |
|------------------------------|------------------|--------------------|-------------|------------------|--------------------|
| eNOS                         | Becton Dickinson | 610296             | Ms          | mAb              | WB                 |
| Fibrillarin                  | Santa Cruz       | SC374022           | Ms          | mAb              | WB                 |
| Histone 3 (H3)               | Cell Signaling   | 9715               | Rb          | pAb              | WB                 |
| Hdac1 (10E2)                 | Abcam            | ab46985            | Ms          | mAb              | ChIP               |
| Hdac2 (H54)                  | Santa Cruz       | SC7899             | Rb          | pAb              | WB, IP             |
| Hdac2                        | GeneTex          | GTX109642          | Rb          | pAb              | ChIP               |
| iNOS                         | Cell Signaling   | 2982               | Rb          | pAb              | WB                 |
| Klf4                         | Abcam            | ab72543            | Rb          | pAb              | WB                 |
| Myc-Tag (9B11)               | Cell Signaling   | 2276               | Ms          | mAb              | WB                 |
| Nanog                        | Abcam            | ab80892            | Rb          | pAb              | WB                 |
| nNOS                         | Cell Signaling   | 4234               | Rb          | pAb              | WB                 |
| Oct4                         | Abcam            | ab19857            | Rb          | pAb              | WB                 |
| p53 (Pab240)                 | Santa Cruz       | SC99               | Ms          | mAb              | WB, ChIP           |
| Acetyl-p53 (Lys379)          | Cell Signaling   | 2570               | Rb          | pAb              | WB                 |
| S-Nitroso-Cysteine (SNO-Cys) | Alpha Diagnostic | NISC11-A           | Rb          | pAb              | IP, WB             |
| Sox2                         | Abcam            | ab97959            | Rb          | pAb              | WB                 |
| Zeb1                         | Active motif     | 61119              | Rb          | pAb              | IP                 |
| Zeb1 (H-102)                 | Santa Cruz       | SC25388            | Rb          | mAb              | WB, ChIP           |
| $\alpha$ -tubulin (DM1A)     | Cell Signaling   | 3873               | Ms          | mAb              | WB                 |
| $\beta$ -Actin (6-11B-1)     | SIGMA-ALDRICH    | T6793              | Ms          | mAb              | WB                 |

Ms=mouse; Rb=rabbit; mAb=monoclonal antibody; pAb=polyclonal antibody; WB=western blotting; IP=immunoprecipitation; ChIP=chromatin immunoprecipitation.

**Supplementary table 5.** qRT-PCR primer list

| Gene   | Forward primer                   | Reverse primer                 |
|--------|----------------------------------|--------------------------------|
| Wnt3   | 5'-CAGATGCCCCGCTCAGCTATGAACA-3'  | 5'-AGCAGCACCAGTGGAAGACGCAAT-3' |
| Wnt7b  | 5'-GTCAGGGATGTTTGTCCCACTTG-3'    | 5'-TCTGGTAGGTCCTTGTGCCACTC-3'  |
| Dll1   | 5'-GATACACACAGCAAACGTGACACC-3'   | 5'-TTCCATCTTACACCTCAGTCGCTA-3' |
| Tbx4   | 5'-GCTTCACTTATATGG-TACTCAG-3'    | 5'-ACGGTCAATGGGGGAAGAAGG-3'    |
| Mesp2  | 5'-CCGGTCCAGCTTCCCAGAGTCACACC-3' | 5'-GGACACCCCACTACTCATGGCTGA-3' |
| eNOS   | 5'-CATGAGTTCAGAGATTGGCATGAG-3'   | 5'-GGACACCCCACTACTCATGGCTGA-3' |
| nNOS   | 5'-CCGCCAAAACCTGCAAAG-3'         | 5'-TGTGGAGACCACGAAGATG-3'      |
| iNOS   | 5'-CAACTACTGCTGGTGGTGACA-3'      | 5'-TGAAGGTGTGGTTGAGTTCTCT-3'   |
| Flk1   | 5'-CCAGTGGTACTGGCAGCTAGAA-3'     | 5'-TTCCCCCCTGGAAATCCT-3'       |
| SMA    | 5'-CCAGCACCATGAAGATCAAG-3'       | 5'-TGGAAGGTAGACAGCGAAGC-3'     |
| CXCR4  | 5'-CCGGGATGAAAACGTCCAT-3'        | 5'-TGCCGACTATGCCAGTCAA-3'      |
| Nkx2.5 | 5'-GCTACAAGTGCAAGCGACAG-3'       | 5'-GGGTAGGCGTTGTAGCCATA-3'     |
| Myh6   | 5'-CTCATGCGCATTGAGTTCAAG-3'      | 5'-CGAATGTTCCACTGGATAACCA-3'   |
| Myh7   | 5'-TCTGCTGAAGGACACTCAAATCC-3'    | 5'-GTTCTCTTTCAGGTCGTCATTGG-3'  |
| Acta1  | 5'-GCCAGAGTCAGAGCAGCAGA-3'       | 5'-TTGCTCTGGGCCCTCATCACC-3'    |
| Cx30.2 | 5'-CACTACCGCTTCTGGCTCTT-3'       | 5'-TGGAGTAGATGACGAACAGCA-3'    |
| Cas2   | 5'-CTGCCTCCATCATTGAGAGAAT-3'     | 5'-TCATTACTGGGATCCTTCACG-3'    |
| Olig2  | 5'-GTGGCTTCAAGTCATCTTCC-3'       | 5'-GTAGATCTCGCTCACCAGTC-3'     |
| Meis1  | 5'-CGAGCAGTCAGCCAAGGGAC-3'       | 5'-TCAGTCACCATTGTAGACAACG-3'   |
| Pax6   | 5'-AACACCAACTCCATCAGTTC-3'       | 5'-ATCTGGATAATGGGTCTCT-3'      |
| p0     | 5'-GCGTCCTGGCATTGTCTGT-3'        | 5'-GAAGGCCTTGACCTTTTCAGTAAG-3' |

**Supplementary table 6.** ChIP-qRT-PCR primer list

| <b>Gene</b>      | <b>Forward primer</b>        | <b>Reverse primer</b>        |
|------------------|------------------------------|------------------------------|
| miR200 cluster 1 | 5'-GGTGGGCCCCTAGGAGTCT-3'    | 5'-ATCTGCAGCCCCAAGTCTGT-3'   |
| Dll1             | 5'-GGTCCTCGGTGTGTGTTCTC-3'   | 5'-CGCTCCCAGAGTGTTCTA-3'     |
| Mesp2            | 5'-AGTAGCAGGGCGGAGTGAAG-3'   | 5'-GGTGTCAAAACCCACAGAGC-3'   |
| Tbx4             | 5'-CTGGGGGACTCTTCACAG-3'     | 5'-CATCTCCTGCGGGCACAG-3'     |
| Wnt7b            | 5'-TCCACATTCTGAACCCAG-3'     | 5'-CGTTCGGTCACACTGCC-3'      |
| Wnt3             | 5'-GATTGGCTGCTCGCTGACATCC-3' | 5'-CTTGAGGTTGGAAATGACTTTC-3' |
| eNOS             | 5'-TAGGGCTGTGCGGCAAGCA-3'    | 5'-TGGTCGGGTTGGGGACGG-3'     |

**Supplementary table 7.** Target-specific sgRNAs for CRISPR/Cas9 technology

| Gene    | Forward primer                 | Reverse primer                 |
|---------|--------------------------------|--------------------------------|
| Zeb1_1  | 5'-caccgCCCGAGGAAGACCAGCGGC-3' | 5'-aac-GCCGCTGGTCTTCCTCGGGc-3' |
| Zeb1_2  | 5'-caccgCTTGATGCCTGTGAATGGC-3' | 5'-aacGCCATTCACAGGCATCAAGc-3'  |
| Hdac2_1 | 5'-caccgAACGTCCGAGAAGATTGTC-3' | 5'-aacGACAATCTTCTCCGACGTTc-3'  |
| Hdac2_2 | 5'-caccgATATGGCTGTCAATTGGGC-3' | 5'-aacGCCAATTGACAGCCATATc-3'   |
| eNOS_1  | 5'-caccgAGACGCTGCTTGGGATCCC-3' | 5'-aacGGGATCCCAAGCAGCGTCTc-3'  |
| eNOS_2  | 5'-caccgGTTTGGGGCCAAGCAGGCC-3' | 5'-aacGGCCTGCTTGGCCCCAAACc-3'  |
| NTC     | 5'-caccgTTCCGGGCTAACAAGTCCT-3' | 5'-aacAGGACTTGTTAGCCCGGAAC-3'  |
